# Supplementary material
Source: HighWire-hosted journal article supplement (https://tobaccocontrol.bmj.com/content/30/5/570)
Supplement: inline-supplementary-material-1 [file inline-supplementary-material-1.pdf]

Supplementary Table 1  
**Observation protocol within each venue**

| Type of venue                        | Locations within each venue to be observed <sup>a</sup>                                                                                                                                                                                                                     |                                                                                                                                                                                                                                              |                                                                                                                                                                                                                                                                                 |
|--------------------------------------|-----------------------------------------------------------------------------------------------------------------------------------------------------------------------------------------------------------------------------------------------------------------------------|----------------------------------------------------------------------------------------------------------------------------------------------------------------------------------------------------------------------------------------------|---------------------------------------------------------------------------------------------------------------------------------------------------------------------------------------------------------------------------------------------------------------------------------|
|                                      | Accessible to the public                                                                                                                                                                                                                                                    |                                                                                                                                                                                                                                              | Restricted to the public                                                                                                                                                                                                                                                        |
|                                      | Enclosed                                                                                                                                                                                                                                                                    | Semi-open and open                                                                                                                                                                                                                           | Enclosed                                                                                                                                                                                                                                                                        |
| <b>Health facilities</b>             | <ul style="list-style-type: none"> <li>• Main reception/Lobby area</li> <li>• One waiting room</li> <li>• One cafeteria</li> <li>• Two staircases, including exit platforms to open areas</li> <li>• One elevator</li> <li>• Two bathrooms (One for each gender)</li> </ul> | <ul style="list-style-type: none"> <li>• One semi-open area within the establishment premises</li> <li>• One open area within the establishment premises</li> <li>• One external entrance door area to the establishment building</li> </ul> | <ul style="list-style-type: none"> <li>• One hospital internal medicine ward or One ambulatory consulting office if non-hospital settings,</li> <li>• One private office or One break room for nurses</li> <li>• One private office or One break room for physicians</li> </ul> |
| <b>Primary and secondary schools</b> | <ul style="list-style-type: none"> <li>• Main reception/Lobby area</li> <li>• One common area</li> <li>• Two staircases, including exit platforms to open areas</li> <li>• One elevator</li> </ul>                                                                          | <ul style="list-style-type: none"> <li>• One semi-open area within the establishment premises</li> <li>• One open area within the establishment premises</li> <li>• One external entrance door area to the establishment building</li> </ul> | <ul style="list-style-type: none"> <li>• Two classrooms</li> <li>• One teachers'/staff common room</li> <li>• One private office</li> <li>• One bathroom for students</li> <li>• One bathroom for teachers/staff</li> </ul>                                                     |
| <b>Higher education centres</b>      | <ul style="list-style-type: none"> <li>• Main reception/Lobby area</li> <li>• One common area</li> </ul>                                                                                                                                                                    | <ul style="list-style-type: none"> <li>• One semi-open area within the establishment premises</li> </ul>                                                                                                                                     | <ul style="list-style-type: none"> <li>• Two classrooms</li> <li>• One teachers'/staff common room</li> </ul>                                                                                                                                                                   |

|                                                                       |                                                                                                                                                                                                                                      |                                                                                                                                                                                 |                                                                                                                                                                                                                                                                                          |
|-----------------------------------------------------------------------|--------------------------------------------------------------------------------------------------------------------------------------------------------------------------------------------------------------------------------------|---------------------------------------------------------------------------------------------------------------------------------------------------------------------------------|------------------------------------------------------------------------------------------------------------------------------------------------------------------------------------------------------------------------------------------------------------------------------------------|
|                                                                       | <ul style="list-style-type: none"> <li>• Two staircases, including exit platforms to open areas</li> <li>• One elevator</li> </ul>                                                                                                   | <ul style="list-style-type: none"> <li>• One open area within the establishment premises</li> </ul>                                                                             | <ul style="list-style-type: none"> <li>• One private office</li> <li>• One bathroom for students</li> <li>• One bathroom for teachers/staff</li> </ul>                                                                                                                                   |
| <b>Government offices and facilities</b>                              | <ul style="list-style-type: none"> <li>• Main reception/Lobby area</li> <li>• All customer service areas</li> <li>• One staircase, including exit platforms to open areas</li> <li>• One elevator</li> <li>• One bathroom</li> </ul> | <ul style="list-style-type: none"> <li>• One semi-open area around the main entrance door to the building</li> <li>• One open area within the establishment premises</li> </ul> | <ul style="list-style-type: none"> <li>• One isolated office occupied by a single individual</li> <li>• One isolated office occupied by more than one individual</li> <li>• One staircase for staff, including exit platforms to open areas</li> <li>• One bathroom for staff</li> </ul> |
| <b>hospitality venues serving primarily meals such as restaurants</b> | <ul style="list-style-type: none"> <li>• Main reception/Lobby area</li> <li>• All customer service areas</li> <li>• One staircase, including exit platforms to open areas</li> <li>• One elevator</li> <li>• One bathroom</li> </ul> | <ul style="list-style-type: none"> <li>• All semi-open areas within the establishment premises</li> <li>• One open area within the establishment premises</li> </ul>            | <ul style="list-style-type: none"> <li>• One Staff changing room</li> <li>• One staff bathroom</li> </ul>                                                                                                                                                                                |
| <b>hospitality venues serving primarily</b>                           | <ul style="list-style-type: none"> <li>• Main reception/Lobby area</li> </ul>                                                                                                                                                        | <ul style="list-style-type: none"> <li>• All semi-open areas within the establishment premises</li> </ul>                                                                       | <ul style="list-style-type: none"> <li>• One staff changing room</li> <li>• One staff bathroom</li> </ul>                                                                                                                                                                                |

|                                             |                                                                                                                                                                                                              |                                                                                                                                                                                 |                                                                                                                                                                                                                                                                                          |
|---------------------------------------------|--------------------------------------------------------------------------------------------------------------------------------------------------------------------------------------------------------------|---------------------------------------------------------------------------------------------------------------------------------------------------------------------------------|------------------------------------------------------------------------------------------------------------------------------------------------------------------------------------------------------------------------------------------------------------------------------------------|
| <b>drinks such as cafes, bars, and pubs</b> | <ul style="list-style-type: none"> <li>• All customer service areas</li> <li>• One staircase, including exit platforms to open areas</li> <li>• One elevator</li> <li>• One bathroom</li> </ul>              | <ul style="list-style-type: none"> <li>• One open area within the establishment premises</li> </ul>                                                                             |                                                                                                                                                                                                                                                                                          |
| <b>Private workplaces</b>                   | <ul style="list-style-type: none"> <li>• Main reception/Lobby area</li> <li>• All customer service areas</li> <li>• One staircase, including exit platforms to open areas</li> <li>• One elevator</li> </ul> | <ul style="list-style-type: none"> <li>• One semi-open area around the main entrance door to the building</li> <li>• One open area within the establishment premises</li> </ul> | <ul style="list-style-type: none"> <li>• One isolated office occupied by a single individual</li> <li>• One isolated office occupied by more than one individual</li> <li>• One staircase for staff, including exit platforms to open areas</li> <li>• One bathroom for staff</li> </ul> |

<sup>a</sup> These are the locations that must be observed at a minimum, if they exist in the venue. It includes all areas that fieldworkers must transit to reach the required locations
